# Supplementary material
Source: publisher site journal article supplement (https://www.dovepress.com/article/562267)
Supplement: Supplementary file 1 [file 562267%20Revised%20%2509Supplementary%20Material.docx]

**Supplementary Material**

For：“Auricular Plaster Therapy for Preoperative Anxiety in Major Surgery: A Prospective Matched-Cohort Study of Total Knee Arthroplasty and Pancreaticoduodenectomy Patients”

**Table of Contents**

[Section 1: Measurement Methods 2](#_Toc215186493)

[Section 2: Adaptation and Validation of the M-PSQI 11](#_Toc215186494)

# Section 1: Measurement Methods

To clarify the assessment requirements and ensure standardized information collection and data quality, while respecting participants' individual differences (such as dialect or educational background), we permit legal guardians to provide assistance in completing the forms in accordance with guidelines. At the same time, we strictly commit to maintaining information confidentiality and defining usage scope to build trust and secure participants' understanding and cooperation. The specific instructions are as Box S1.

**Box S1.** Participant Instructions for Self-Report Scale Assessment

| **General Instructions** |
| --- |
| Dear Participant,  To ensure the accuracy and validity of the assessment results, we kindly ask you to complete the following scales independently to the best of your ability. Please respond based on your genuine feelings and actual circumstances.  We recognize that some participants may have difficulty understanding the scale content due to reasons such as dialect differences, educational background, or other factors. If you find yourself unable to complete the scales independently, your legal guardian may assist you. In such cases, please ensure that your guardian fills out the forms based on the actual situation and personal feelings you describe, maintaining objectivity and truthfulness.  Your privacy is of utmost importance. All information you provide will be held in strict confidence and used solely to enhance your care and contribute to medical research. Your participation is key to helping us better support you.  Thank you for your understanding and cooperation! |

The following text elaborates on the design methodologies of the various outcome measurement tools.

1. **Perioperative Anxiety Scale-7 (PAS-7)**

This scale was used to evaluate the anxiety of patients before surgery.

This scale evaluates some of the patient's conditions regarding the operation, and then, based on the actual situation during the days of hospitalization, selects the appropriate option among 5 options, circling the corresponding numbers. The higher the score, the more severe the patient's preoperative anxiety level. The scale content is as Table S1.

**Table S1.** Preoperative Anxiety Scale (PAS-7) Assessment Tool and Scoring Criteria

| Instructions (To be read by the evaluator): Next, we need to understand your feelings of anxiety before the surgery. Please answer the following 7 questions based on your current genuine experience. Your responses will help us provide you with better psychological support. | | | | | |
| --- | --- | --- | --- | --- | --- |
| Item | Not at all | Somewhat | Moderately | Fairly obvious | Very obvious |
| 1. I am worried about the surgical outcome | 0 | 1 | 2 | 3 | 4 |
| 2. I am worried about unexpected incidents during surgery | 0 | 1 | 2 | 3 | 4 |
| 3. I am worried about pain caused by the surgery | 0 | 1 | 2 | 3 | 4 |
| 4. Thinking about the surgery makes me more tense and anxious than usual | 0 | 1 | 2 | 3 | 4 |
| 5. Thinking about the surgery makes my hands and feet tremble | 0 | 1 | 2 | 3 | 4 |
| 6. Thinking about the surgery makes my face flush, feel hot, or my hands and feet sweat | 0 | 1 | 2 | 3 | 4 |
| 7. Thinking about the surgery makes it difficult for me to breathe | 0 | 1 | 2 | 3 | 4 |

1. **Modified Pittsburgh Sleep Quality Index (M-PSQI)**

To accommodate the short treatment duration and unique ward environment of hospitalized patients, this study modified the Pittsburgh Sleep Quality Index (PSQI) to develop an adapted version (M-PSQI) for short-term sleep assessment (Table S2, S3). The scale consists of 24 items (19 self-rated + 5 caregiver-rated), with scoring based on the 19 self-rated items, which assess the following dimensions:

1.Sleep Process Metrics: Sleep latency, total sleep duration, wake time

2.Sleep Disturbance Manifestations: Difficulty falling asleep, nocturnal awakening frequency, environmental/physiological sleep disruptions

3.Subjective Sleep Quality: Patients' overall evaluation of sleep quality

4.Medication Use: Frequency of sedative-hypnotic drug use

5.Daytime Functional Impairment: Difficulty maintaining wakefulness, reduced task performance efficiency

The scale adopts a 7-factor structure, with each factor scored on a 0–3 scale. The total score ranges from 0 to 21, with higher scores indicating more severe sleep disturbances.

**Table S2.** Modified Pittsburgh Sleep Quality Index (M-PSQI): Assessment Items and Scoring Criteria

| Instructions (To be read by the evaluator): To assess your sleep quality during your hospital stay, we will use a modified sleep quality questionnaire. Please answer the questions truthfully based on your actual sleep situation over the past few days. Your feedback will help us better improve your in-hospital sleep experience. | | |
| --- | --- | --- |
| **No.** | **Item** | **Options** |
| 1 | What time did you usually go to bed over the past 4 days? (Please use 24-hour format) | Time to bed: ______ Hour ______ Minute |
| 2 | How long did it usually take you to fall asleep each night over the past 4 days? | 0 points -- ≤15 min 1 point -- 16~30 min 2 points -- 31~60 min 3 points -- >60 min |
| 3 | What time did you usually wake up in the morning over the past 4 days? (Please use 24-hour format) | Wake-up time: ______ Hour ______ Minute |
| 4 | How much actual sleep time did you get each night over the past 4 days? | Actual sleep time per night: ____ h ____ min |
| **Over the past 4 days, did you often have poor sleep due to the following problems? (Applies to items 5A~5J, 6, 7, 8, 9)** | | |
| 5 | A. Could not fall asleep within 30 minutes | 0 points -- Not in the past 4 days 1 point -- 1 night 2 points -- 2 nights 3 points -- Almost every night |
| B. Woke up in the middle of the night or woke up too early | 0 points -- Not in the past 4 days 1 point -- 1 night 2 points -- 2 nights 3 points -- Almost every night |
| C. Needed to get up to use the bathroom | 0 points -- Not in the past 4 days 1 point -- 1 night 2 points -- 2 nights 3 points -- Almost every night |
| D. Uncomfortable breathing | 0 points -- Not in the past 4 days 1 point -- 1 night 2 points -- 2 nights 3 points -- Almost every night |
| E. Loud coughing or snoring | 0 points -- Not in the past 4 days 1 point -- 1 night 2 points -- 2 nights 3 points -- Almost every night |
| F. Feeling too cold | 0 points -- Not in the past 4 days  1 point -- 1 night  2 points -- 2 nights  3 points -- Almost every night |
| G. Feeling too hot | 0 points -- Not in the past 4 days 1 point -- 1 night 2 points -- 2 nights 3 points -- Almost every night |
| H. Having bad dreams | 0 points -- Not in the past 4 days 1 point -- 1 night 2 points -- 2 nights 3 points -- Almost every night |
| I. Experiencing pain | 0 points -- Not in the past 4 days 1 point -- 1 night 2 points -- 2 nights 3 points -- Almost every night |
| J. Other things affecting your sleep | 0 points -- Not in the past 4 days 1 point -- 1 night 2 points -- 2 nights 3 points -- Almost every night |
| 6 | Overall, how would you rate your sleep quality over the past 4 days? | 0 points -- Very good 1 point -- Fairly good 2 points -- Poor 3 points -- Very poor |
| 7 | How often did you use sleep medication over the past 4 days? | 0 points -- Did not use 1 point -- 1 night 2 points -- 2 nights 3 points -- Almost every night |
| 8 | Over the past 4 days, did you have difficulty staying awake during daily activities? | 0 points -- No 1 point -- 1 day 2 points -- 2 days 3 points -- Almost every day |
| 9 | Over the past 4 days, did you have any difficulty undergoing the various preoperative examinations? | 0 points -- No difficulty 1 point -- A little difficulty 2 points -- Somewhat difficult 3 points -- Very difficult |

**Table S3.** M-PSQI Dimensions (Factors): Definitions and Scoring Methods

| This scale is completed by healthcare staff and does not need to be filled out by the patient. | | |
| --- | --- | --- |
| **Component** | **Scoring Method** | **Score** |
| **A. Sleep Quality** | Scored based on the response to Item 6 |  |
| **B. Sleep Latency** | Sum the scores of Item 2 and Item 5A "0" = 0 points "1~2" = 1 point "3~4" = 2 points "5~6" = 3 points |  |
| **C. Sleep Duration** | Scored based on the response to Item 4 ">7h" = 0 points "6~7h (excluding 6h)" = 1 point "5~6h (including 6h)" = 2 points "<5h" = 3 points |  |
| D. Sleep Efficiency | Sleep Efficiency = [Item 4 (Sleep Duration) / Time in Bed] × 100% Note: Time in Bed = Item 3 (Wake-up time) - Item 1 (Bedtime) Efficiency >85% = 0 points Efficiency 75%~84% = 1 point Efficiency 65%~74% = 2 points Efficiency <65% = 3 points |  |
| **E. Sleep Disturbances** | Sum the scores of Items 5B through 5J "0" = 0 points "1~9" = 1 point "10~18" = 2 points "19~27" = 3 points |  |
| **F. Use of Sleep Medication** | Scored based on the response to Item 7 |  |
| **G. Daytime Dysfunction** | Sum the scores of Item 8 and Item 9 "0" = 0 points "1~2" = 1 point "3~4" = 2 points "5~6" = 3 points |  |
| **PSQI Global Score**=**Sum of the scores from Component A to Component G** | | |

1. **Self-Rating Anxiety Scale (SAS) Score**

The Self-Rating Anxiety Scale (SAS) was used to comprehensively evaluate the baseline anxiety levels of patients undergoing total knee arthroplasty (TKA) before surgery.

**Key Features of the SAS:**

**Assessment Period**: The scale assesses the patient's anxiety levels over the **past week**.

**Scoring Method**: **Forward-scoring items**: Responses A, B, C, and D are scored as 1, 2, 3, and 4 points, respectively. **Reverse-scoring items**: Responses are scored as 4, 3, 2, and 1 points, respectively. The reverse-scored items are **5, 9, 13, 17, and 19** (highlighted in bold in the table below).All other items are forward-scored.

**Score Calculation and Interpretation**: The raw score is obtained by summing the scores of all 20 items. The raw score is then multiplied by **1.25** and rounded to the nearest whole number to derive the **standard score**. The **cutoff value for anxiety** is 50. Higher scores indicate more pronounced anxiety tendencies.

**50-59**: Mild anxiety

**60-69**: Moderate anxiety

**70 and above**: Severe anxiety.

The content of the SAS is shown in Table S4.

**Table S4**. Self-Rating Anxiety Scale (SAS): Items and Response Options

| **Self-Rating Anxiety Scale (SAS)** | | | | |
| --- | --- | --- | --- | --- |
| Instructions (To be read by the evaluator): Below is a list of twenty statements. Please read each one carefully and, based on your actual feelings over the past week, select the answer that best corresponds to your situation. Each statement is followed by four options, indicating: A: None or a little of the time B: Some of the time C: A good part of the time D: Most or all of the time | | | | |
| 1. I feel more nervous or anxious than usual | A | B | C | D |
| 2. I feel afraid for no reason | A | B | C | D |
| 3. I get upset easily or feel panicky | A | B | C | D |
| 4. I feel like I might go crazy | A | B | C | D |
| **5. I feel that everything is fine** | A | B | C | D |
| 6. My hands and feet shake or tremble | A | B | C | D |
| 7. I am bothered by headaches, neck pain, or back pain | A | B | C | D |
| 8. I feel weak and tired easily | A | B | C | D |
| **9. I feel calm and can sit still easily** | A | B | C | D |
| 10. I feel my heart beating very fast | A | B | C | D |
| 11. I am bothered by spells of dizziness | A | B | C | D |
| 12. I have fainting spells or feel like I'm about to faint | A | B | C | D |
| **13. I find it easy to breathe in and out** | A | B | C | D |
| 14. My hands and feet feel numb and tingling | A | B | C | D |
| 15. I am bothered by stomach pain and indigestion | A | B | C | D |
| 16. I often need to urinate | A | B | C | D |
| **17. My hands and feet are often dry and warm** | A | B | C | D |
| 18. My face gets flushed and hot | A | B | C | D |
| **19. I fall asleep easily and sleep well through the night** | A | B | C | D |
| 20. I have nightmares | A | B | C | D |

1. **Patient Satisfaction with Pre-operative Preparation Assessed with the Visual Analogue Scale (VAS-Satisfaction)**

The Visual Analogue Scale for Satisfaction (VAS-Satisfaction) is a simple, validated tool used to measure a patient's subjective satisfaction with their pre-operative preparation. It consists of a 100-mm horizontal line anchored by two extreme statements: Left anchor (0 mm): "Not at all satisfied "; Right anchor (100 mm): "Completely satisfied" ( Figure S1).

The patient marks a point on the line corresponding to their level of satisfaction with the pre-operative process (This includes the information provided before surgery, the attitude of the medical staff, the arrangement of the preoperative process, and the overall experience of preoperative preparation, see Box S2). The score is quantified by measuring the distance (in mm) from the left anchor to the patient’s mark, yielding a numerical value between 0 (lowest satisfaction) and 100 (highest satisfaction).

**Box S2.** Visual Analogue Scale for Satisfaction (VAS-Satisfaction) Assessment Instructions

| VAS-Satisfaction |
| --- |
| Instructions (To be read by the evaluator): Next, we need to understand your satisfaction level with the preoperative preparations for this surgery. Please read the following instructions carefully:  Here is a straight line ranging from 0 to 100. The leftmost point, 0, indicates "completely dissatisfied," and the rightmost point, 100, indicates "completely satisfied." Based on your actual feelings, please mark a point on the line to reflect your satisfaction level regarding the following aspects:  **1.Whether the information provided by the doctors or nurses before the surgery was clear and sufficient (e.g., surgical procedure, precautions, etc.).**  **2.The attitude and communication style of the medical staff (e.g., whether they were patient, whether they could alleviate your anxiety).**  **3.The rationality of the process arrangements, such as preoperative examinations, fasting, and waiting times.**  **4.The overall experience of the preoperative preparation.**  If you are very satisfied, you can mark a point closer to 100; if you feel neutral, you can mark near the middle; if you are not very satisfied, you can mark a point closer to 0.  Please complete this independently without overthinking; simply mark based on your first impression. Your feedback will help us improve our preoperative services. Thank you for your cooperation |

**Figure S1.** Visual Analogue Scale (VAS) for Satisfaction Assessment


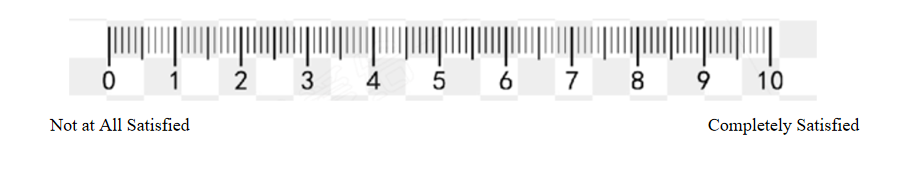


1. **Visual Analogue Scale for Pain (VAS-Pain)**

The Visual Analogue Pain Score (VAS-Pain) is a tool used to quantify a patient's subjective pain intensity using a straight line of 100 millimeters (10 cm) with two ends representing "no pain" and "worst pain imaginable", and the patient assesses their pain level by marking their position on the straight line (Figure S2, Box S2).

**Box S3.** Visual Analogue Scale for Pain (VAS-Pain) Assessment Instructions

| VAS-Pain |
| --- |
| Instructions (To be read by the evaluator): Next, we need to assess your current level of pain. Please read the following instructions carefully:  You will see a 10-centimeter horizontal line. The left end of the line, marked 0, indicates "no pain at all," and the right end, marked 10, indicates "the most intense pain imaginable." Please follow these steps:  Imagine your current level of pain. Then, make a mark (a vertical line or an 'X') on the spot along this line that best represents your pain level. When assessing, please consider:  **The impact of the pain on your daily activities;**  **The intensity of the pain;**  **The discomfort caused by the pain.** |

**Figure S2.** Visual Analogue Scale (VAS) for Pain Assessment


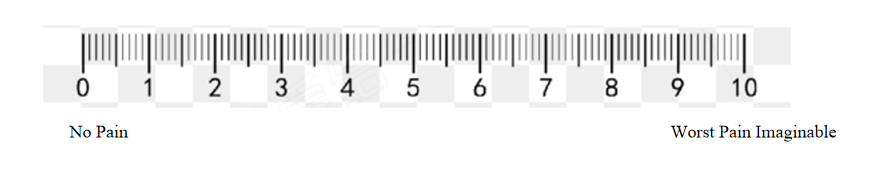


1. **Confusion assessment method (CAM)**

The confusion assessment method (CAM) is a widely used delirium assessment tool for non-psychiatrists. Trained evaluators typically complete assessments in 3-5 minutes, making them ideal for busy clinical environments. It mainly relies on brief communication and observation between the evaluator and the patient, and is easy to implement at the bedside (Box S3).

**Box S3.** Confusion Assessment Method (CAM) Evaluation Form and Diagnostic Criteria

| Confusion assessment method (CAM) |
| --- |
| This scale is completed by healthcare staff and does not need to be filled out by the patient. |
| **1. Acute Onset**  a. Is there evidence of an acute change from the patient's baseline mental status?  Yes = 1; No = 2; Uncertain = 8  b. If "Yes," describe the change and the source of information: |
| **2. Inattention** a. Does the patient have difficulty focusing attention? (e.g., easily distractible, difficulty maintaining focus) Never occurred during follow-up = 1; Occurred occasionally and mildly during follow-up = 2; Occurred and was marked during follow-up = 3; Uncertain = 8 b. If inattention is present, did it fluctuate during the follow-up period? (i.e., did it ease or worsen) Yes = 1; No = 2; Uncertain = 8; Not Applicable = 9 c. If "Yes," please describe: |
| **3. Disorganized Thinking** a. Is the patient's thinking disorganized or incoherent? (e.g., rambling or irrelevant conversation, unclear or illogical flow of ideas, unpredictable switching of subjects) Never occurred during follow-up = 1; Occurred occasionally and mildly during follow-up = 2; Occurred and was marked during follow-up = 3; Uncertain = 8 b. If disorganized thinking is present, did it fluctuate during the follow-up period? Yes = 1; No = 2; Uncertain = 8; Not Applicable = 9 c. If "Yes," please describe: |
| **4. Altered Level of Consciousness**  a. How would you rate the patient's overall level of consciousness?  Alert = 1 (If alert, proceed directly to Question 5)  Vigilant (e.g., hyper-alert, overly sensitive to environmental stimuli, easily startled) = 2  Lethargic (drowsy but easily roused) = 3  Stupor (difficult to rouse) = 4  Coma (unrousable) = 5  Uncertain = 8  b. If the level of consciousness is altered, did it fluctuate during the follow-up period?  Yes = 1; No = 2; Uncertain = 8; Not Applicable = 9  c. If "Yes," please describe: |
| **5. Disorientation**  a. Did the patient exhibit disorientation during the follow-up period? (e.g., disorientation to place or time)  Never occurred during follow-up = 1; Occurred occasionally and mildly during follow-up = 2; Occurred and was marked during follow-up = 3; Uncertain = 8  b. If disorientation is present, did it fluctuate during the follow-up period?  Yes = 1; No = 2; Uncertain = 8; Not Applicable = 9  c. If "Yes," please describe: |
| **6. Memory Impairment** a. Did the patient exhibit memory impairment during the follow-up period? (e.g., inability to recall events in the hospital or difficulty remembering instructions) Never occurred during follow-up = 1; Occurred occasionally and mildly during follow-up = 2; Occurred and was marked during follow-up = 3; Uncertain = 8 b. If memory impairment is present, did it fluctuate during the follow-up period? Yes = 1; No = 2; Uncertain = 8; Not Applicable = 9 c. If "Yes," please describe: |
| **7. Perceptual Disturbances** a. Did the patient exhibit perceptual disturbances during the follow-up period? (e.g., visual or auditory hallucinations, delusions) Never occurred during follow-up = 1; Occurred occasionally and mildly during follow-up = 2; Occurred and was marked during follow-up = 3; Uncertain = 8 b. If perceptual disturbances are present, did they fluctuate during the follow-up period? Yes = 1; No = 2; Uncertain = 8; Not Applicable = 9 c. If "Yes," please describe: |
| **8. Psychomotor Agitation** a. Did the patient exhibit increased psychomotor activity during the follow-up period? (e.g., restlessness, picking at bedclothes, frequent position changes) Never occurred during follow-up = 1; Occurred occasionally and mildly during follow-up = 2; Occurred and was marked during follow-up = 3; Uncertain = 8 b. If psychomotor agitation is present, did it fluctuate during the follow-up period? Yes = 1; No = 2; Uncertain = 8; Not Applicable = 9 c. If "Yes," please describe: |
| **9. Altered Sleep-Wake Cycle** a. Is there evidence of a change from the patient's baseline sleep-wake cycle? (e.g., daytime sleepiness, nighttime insomnia) Yes = 1; No = 2; Uncertain = 8 b. If "Yes," please describe: |
| **Diagnostic Criteria**   1. **Acute Onset**: This criterion is met if 1a=1, OR 2b=1, OR 3b=1, OR 4b=1. 2. **Inattention**: This criterion is met if 2a=2 or 3. 3. **Disorganized Thinking**: This criterion is met if 3a=2 or 3. 4. **Altered Level of Consciousness**: This criterion is met if 4a=2, 3, 4, or 5.   **Diagnosis of Delirium is established if:** **Criteria 1 + 2 + 3 are met, OR Criteria 1 + 2 + 4 are met.** |

# Section 2: Adaptation and Validation of the M-PSQI

1. **Background for Modification**

The original Pittsburgh Sleep Quality Index (PSQI) is a well-validated instrument for assessing sleep quality over a one-month interval. However, its retrospective nature and extended recall period are suboptimal for capturing dynamic sleep changes in a fast-paced inpatient surgical environment. To enhance its applicability and sensitivity in the perioperative context, the instrument was adapted. he goal of this adaptation was not to create a new unidimensional construct but to provide a structured and repeatable sleep profile tailored to the inpatient surgical setting.

1. **Psychometric Properties in the Study Sample**

The psychometric properties of the modified M-PSQI were examined using data from the T2 (12±2 hours before surgery) timepoint in the study sample (N=168).

**Table S5. Item-Total Statistics for the Modified Pittsburgh Sleep Quality Index (M-PSQI) at T2**

| **Component** | **Scale Mean if Item Deleted** | **Scale Variance if Item Deleted** | **Corrected Item-Total Correlation** | **Squared Multiple Correlation** | **Cronbach's Alpha if Item Deleted** |
| --- | --- | --- | --- | --- | --- |
| A. Subjective Sleep Quality | 8.60 | 8.075 | 0.346 | 0.192 | 0.375 |
| B. Sleep Latency | 8.43 | 7.660 | 0.301 | 0.250 | 0.380 |
| C. Sleep Duration | 8.75 | 7.063 | 0.327 | 0.354 | 0.358 |
| D. Sleep Efficiency | 9.19 | 7.065 | 0.460 | 0.424 | 0.301 |
| E. Sleep Disturbances | 8.20 | 9.320 | 0.212 | 0.116 | 0.439 |
| F. Use of Sleep Medication | 8.44 | 7.733 | 0.102 | 0.063 | 0.503 |
| G. Daytime Dysfunction | 9.01 | 9.455 | **-0.061** | 0.090 | **0.550** |

**Psychometric Analysis and Interpretation:**

The overall Cronbach's alpha for the 7-item scale was 0.460. The item-total statistics reveal a clear and interpretable pattern:

1. **A Coherent Core Sleep Factor**

Six of the seven components (A to F) show positive corrected item-total correlations, with components A (Subjective Sleep Quality), B (Sleep Latency), C (Sleep Duration), and D (Sleep Efficiency) demonstrating low to moderate correlations (ranging from .301 to .460). This suggests these items collectively measure a related underlying "core sleep quality" construct. This is further supported by the observation that removing any of these items (A to D) results in a lower alpha coefficient (ranging from .301 to .380), indicating they contribute positively to the scale's internal consistency.

1. **A Distinct Daytime Functioning Factor**

Component G (Daytime Dysfunction) exhibits a **negative corrected item-total correlation (-.061)**. Crucially, **deleting this item would increase the scale's alpha to 0.550**. This provides strong empirical evidence that the "Daytime Dysfunction" component measures a construct that is psychometrically distinct from the core sleep quality factors measured by the other items. In the context of preoperative anxiety, it is clinically plausible that a patient's assessment of their daytime function is influenced by factors (e.g., preoperative worry, focus on upcoming surgery) that are different from their retrospective evaluation of previous night's sleep parameters.

**Conclusion:**

The psychometric profile of the M-PSQI at T2 indicates that it is best understood as a composite tool comprising two key elements: a) a relatively coherent set of items assessing perceived nighttime sleep quality, and b) a distinct component assessing daytime dysfunction. The suboptimal overall alpha coefficient primarily reflects the inclusion of the psychometrically separate daytime dysfunction item rather than a fundamental flaw in the sleep quality items. For the purpose of creating a unified "sleep quality" score in acute settings, omitting the daytime dysfunction component could be considered. However, for a comprehensive sleep profile, retaining all components provides valuable, multi-faceted information, with the understanding that the total score represents a composite of related but distinct constructs.
